# Supplementary material
Source: PubMed Central journal article supplement (PMC7479951)

## SUPPLEMENTARY MATERIAL

### *Immunologic Studies*

Flow cytometry was performed on fresh whole blood samples collected at various times after transplant. Cells were stained with a panel of directly conjugated monoclonal antibodies to identify T cells, B cells, natural killer (NK) cells, and dendritic cells (DCs), as well as functional subsets (Table S1). Labeled cells were acquired in a FACSCanto II or LSRFortessa flow cytometer (BDBiosciences) and analyzed using BD FACSDiva™ (BD Biosciences) using standard gating strategies (**Figures S1-2**).

**Table S1. Conjugated monoclonal Antibodies. \* Antibodies used for Lineage**

| <b>Tube</b>            | <b>Antibody</b>      | <b>Brand</b>      | <b>Catalogue #</b> | <b>Clone</b> |
|------------------------|----------------------|-------------------|--------------------|--------------|
| <b>T cells</b>         | CD45RO FITC          | BD                | 555492             | UCHL1        |
|                        | CD279 PD-1 PE        | eBio              | 12-2799-42         | eBioJ105     |
|                        | CD127 PE Cy5         | eBio              | 15-1278-42         | eBioRDR5     |
|                        | CD25 PE Cy7          | BD                | 557741             | M-A251       |
|                        | CD62L APC            | BD                | 559772             | DREG-56      |
|                        | CD4 APC-H7           | BD                | 560158             | RPA-T4       |
|                        | CD3 Pac Blue (V450)  | BD                | 560365             | UCHT1        |
|                        | CD8 BV510            | BioLegend         | 301047             | RPA-T8       |
|                        | <b>B cells</b>       | CD268 BAFF R FITC | eBio               | 11-9117-42   |
| IgD PE                 |                      | BD                | 555779             | IA6-2        |
| CD27 PE Cy5            |                      | eBio              | 15-0279-42         | O323         |
| CD38 PE Cy7            |                      | BD                | 560677             | HIT2         |
| CD19 APC               |                      | BD                | 555415             | HIB19        |
| CD20 APC H7            |                      | BD                | 560734             | 2H7          |
| CD5 Pac Blue (V450)    |                      | BD                | 561154             | UCHT2        |
| CD45 BV510             |                      | BD                | 563204             | HI30         |
| <b>NK cells</b>        |                      | CD16 FITC         | BD                 | 555406       |
|                        | CD56 PE              | BD                | 555516             | B159         |
|                        | CD8 PE Cy7           | BD                | 557746             | RPA-T8       |
|                        | NKG2D APC            | BD                | 558071             | 1D11         |
|                        | CD45 APC H7          | BD                | 560178             | 2D1          |
|                        | CD3 Pac Blue (V450)  | BD                | 560365             | UCHT1        |
|                        | CD4 BV510            | BD                | 562970             | SK3          |
| <b>Dendritic cells</b> | CD123 FITC           | Miltenyi Biotec   | 130-090-897        | AC145        |
|                        | CD141 PE             | BD                | 559781             | 1A4          |
|                        | CD11c PE Cy5         | BD                | 551077             | B-ly6        |
|                        | CD3 PE Cy7*          | BD                | 557851             | SK7          |
|                        | CD19 PE Cy7*         | BD                | 341093             | SJ25C1       |
|                        | CD56 PE Cy7*         | BD                | 557747             | B159         |
|                        | CD14 PE Cy7*         | BD                | 557742             | M5E2         |
|                        | CD86 APC             | BD                | 555660             | 2331 (FUN-1) |
|                        | CD45 APC H7          | BD                | 560178             | 2D1          |
|                        | CD14 Pac Blue (V450) | BD                | 560349             | MphiP9       |
|                        | HLA-DR BV510         | BD                | 563083             | G46-6        |

**Table S2. Multivariable Cox model for OS and PFS for all subjects (N=108)**

|                                         | OS   |        |      |         | PFS  |        |      |         |
|-----------------------------------------|------|--------|------|---------|------|--------|------|---------|
|                                         | HR   | 95% CI |      | p-value | HR   | 95% CI |      | p-value |
| Targeted therapy vs CIT                 | 0.35 | 0.13   | 0.97 | 0.043   | 0.47 | 0.22   | 1.03 | 0.06    |
| Age                                     | 1.04 | 0.98   | 1.10 | 0.20    | 1.03 | 0.99   | 1.08 | 0.17    |
| Male recipient & Female donor           | 1.51 | 0.60   | 3.75 | 0.38    | 2.28 | 1.14   | 4.56 | 0.02    |
| Number of prior therapies               | 1.12 | 0.93   | 1.34 | 0.24    | 1.00 | 0.86   | 1.17 | 0.97    |
| HCT comorbidity score                   | 1.18 | 0.99   | 1.42 | 0.067   | 1.17 | 1.01   | 1.36 | 0.036   |
| Non-busulfan based conditioning regimen | 5.10 | 1.14   | 22.8 | 0.033   | 4.22 | 1.03   | 17.2 | 0.045   |
| <=7/8 HLA match vs. 8/8 match           | 1.50 | 0.48   | 4.70 | 0.48    | 0.87 | 0.31   | 2.46 | 0.79    |
| Relapsed/refractory disease status      | 3.79 | 0.71   | 20.2 | 0.12    | 1.62 | 0.37   | 7.13 | 0.52    |
| Richter's transformation                | 3.62 | 1.01   | 12.9 | 0.048   | 3.97 | 1.50   | 10.5 | 0.005   |

CIT: chemoimmunotherapy. Age, number of prior therapies, and HCT comorbidity were included as continuous variables. Flu/BU1 and Flu/BU2 were collapsed as they were not different in hazard ratio. CR and PR were also collapsed for the interest of power since they were not different in hazard ratio.

**Table S3. List of post HCT therapy**

| Targeted therapy prior to HCT         | Other Therapy prior to HCT                                                                                                                                             | post HCT therapy      |
|---------------------------------------|------------------------------------------------------------------------------------------------------------------------------------------------------------------------|-----------------------|
| None                                  | 1.FR 2. FR 3. BR                                                                                                                                                       | Radiation             |
| None                                  | 1. FR 2. Rituxan+ solumedrol                                                                                                                                           | IBR/Idela+Ofa/R-CHOP  |
| None                                  | 1. FCR                                                                                                                                                                 | Campath               |
| None                                  | 1. FR 2. Campath 3. Bendamustine                                                                                                                                       | Radiation             |
| None                                  | 1. FCR 2. FC 3. Rituxan/High Dose solumedrol 4. Flavopiridol x 4                                                                                                       | Rituximab             |
| None                                  | 1. Fludarabine 2. Fludarabine 3. Rituxan 4. Rituxan, Cytozan, Decadron 5. Rituxan, Cytozan, Decadron 6. CHOP 7. Rituxan, Campath 8. Rituxan solumedrol 9. Flavopiridol | Campath/HDMP          |
| None                                  | 1. FCR 2. FCR                                                                                                                                                          | Ibrutinib             |
| None                                  | 1. RCHOP x 8 2. Radiation to neck 3. FRx6 4. FR 5. BR                                                                                                                  | Ibrutinib             |
| None                                  | 1. FCR 2. Rutxan 3 .R-Solumedrol                                                                                                                                       | Ibrutinib             |
| None                                  | 1. FR 2. FR 3. BR                                                                                                                                                      | Rituxan/Ibrutinib     |
| None                                  | 1. FC 2. Rituxan 3. Ofatumumab HDMP Alemtuzumab                                                                                                                        | Rituxan/R-CHOP/R-ICE  |
| None                                  | 1. ofatumumab Highdose solumedrol, Campath                                                                                                                             | Ibrutinib             |
| None                                  | 1. FR x 6 2. BR x 6 3. Solumedrol/ Rituxan                                                                                                                             | Ibrutinib             |
| None                                  | 1.FR 2. Radiation 3. BR                                                                                                                                                | ibrutinib             |
| None                                  | 1. ofatumumab HDMP alemtuzumab                                                                                                                                         | Ibrutinib             |
| None*                                 | 1. ofatumumab HDMP alemtuzumab                                                                                                                                         | ibrutinib/Ipilimumab  |
| None                                  | 1. FCR 2. BR 3. HDMP + Ofa 4. Ofa +alemtuzumab                                                                                                                         | ipilimumab            |
| Venetoclax*                           | 1. FCR 2. BR 3.FCR 4. BR 5.Ofa+HDMP+Alemtuzumab 6. ABT 199                                                                                                             | Ibrutinib/R-CHOP      |
| Ibrutinib*                            | 1. FR 2. FCR 3. Ibrutinib                                                                                                                                              | R-CHOP/DLI            |
| Venetoclax                            | 1. ofatumumab HDMP alemtuzumab                                                                                                                                         | ibrutinib             |
| Ibrutinib/CART19/Ibrutinib/Venetoclax | 1. Revlimid 2. RCHOP                                                                                                                                                   | venetoclax continuous |
| Ibrutinib                             | 1. FCR x6 2. Rituximab + Ibrutinib                                                                                                                                     | Ibrutinib             |
| Ibrutinib                             | 1. Obinutuzumab                                                                                                                                                        | venetoclax            |

F: Fludarabine, C: cyclophosphamide, R: Rituxan, B: Bendamustine, CHOP: cyclophosphamide+doxorubicin+vincristine+prednisone, HDMP: high-dose methylprednisolone, ICE: ifosfamide+carboplatin+etoposide, DLI: donor lymphocyte infusion

\*: these patients had Richter's Transformation

**Figure S1.** Gating strategy for analysis of T cell subsets

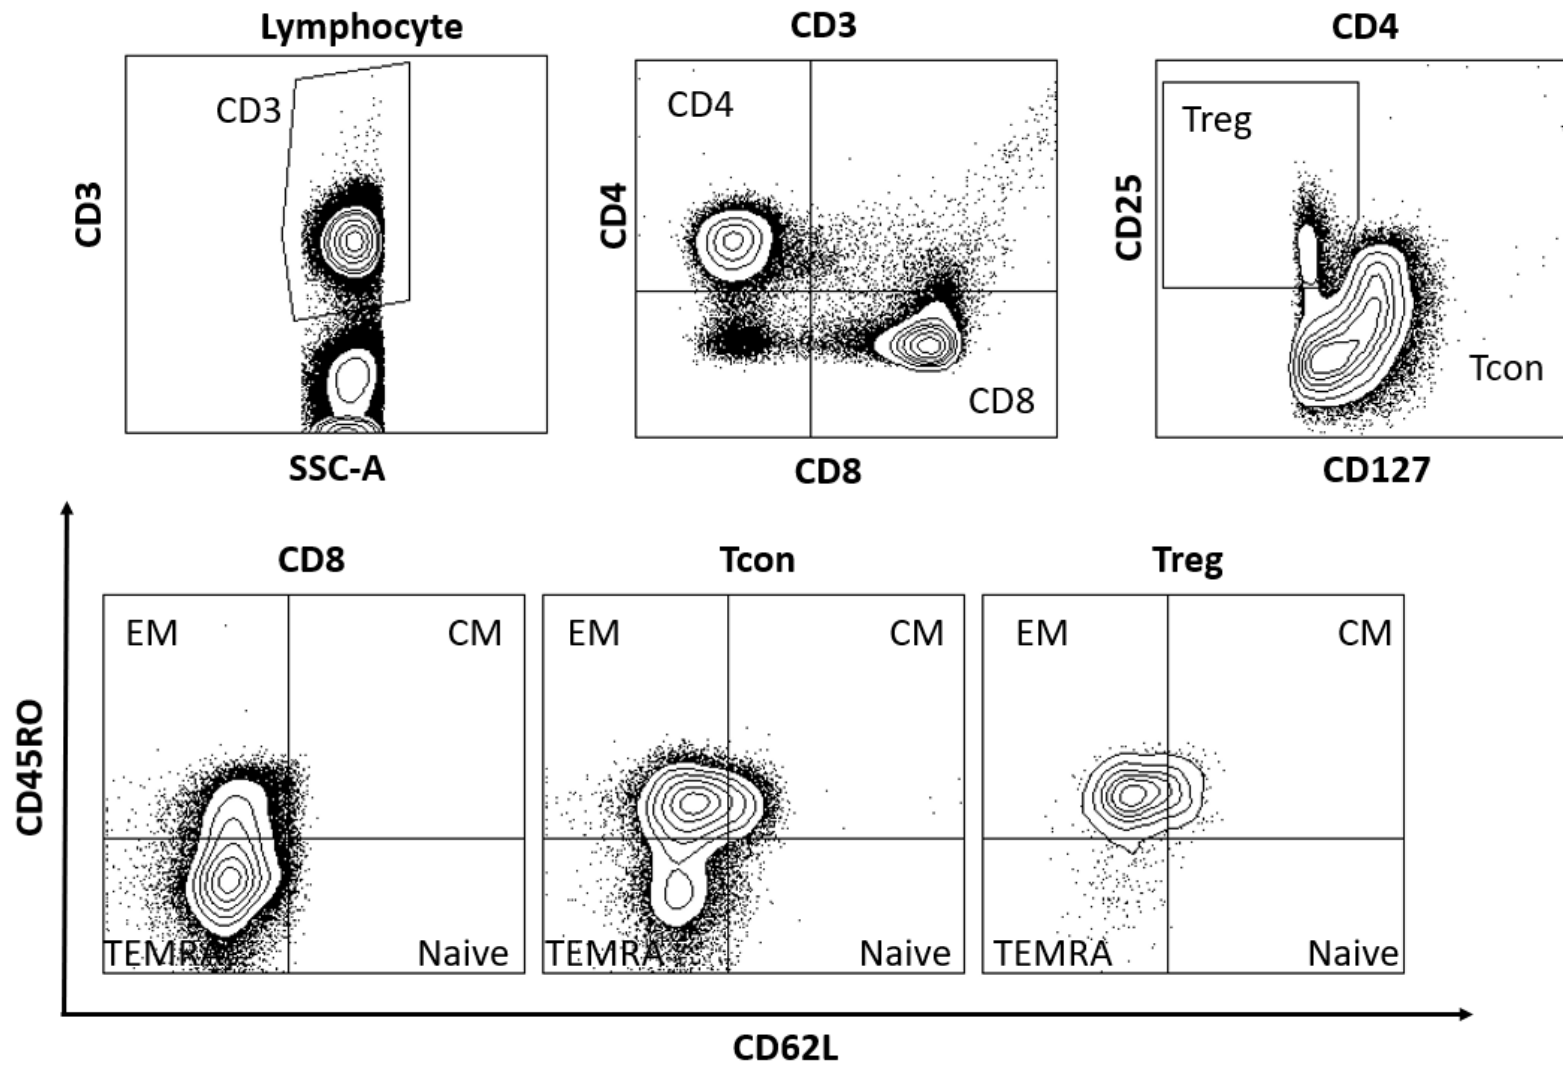

**Figure S2.** Gating strategy for analysis of B, NK and Dendritic cells (DCs). Lineage cocktail includes CD3, CD56, CD14 and CD19 antibodies conjugated to the same fluorescence marker.

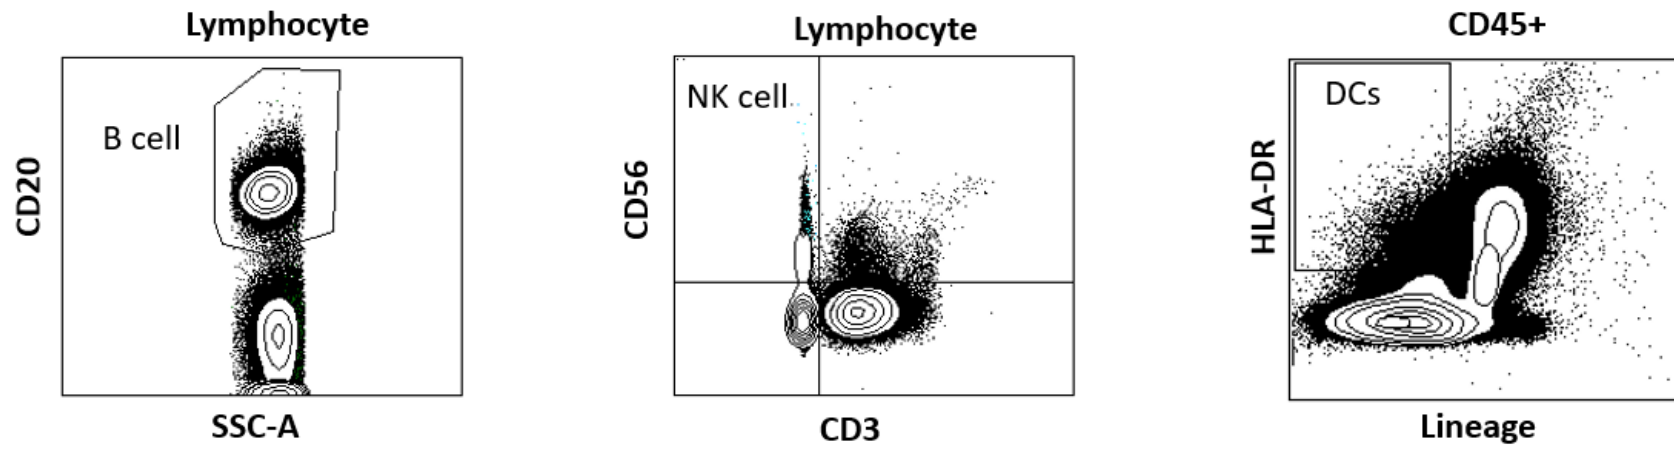

**Figure S3.** (A) OS and (B) PFS according to the disease status for combined cohorts (N=105). Three patients who had relapsed or refractory at alloHCT were excluded. (C) OS and (D) PFS according to the disease status for the prior targeted therapy cohort (N=28). Two patients who had relapsed or refractory at alloHCT were excluded

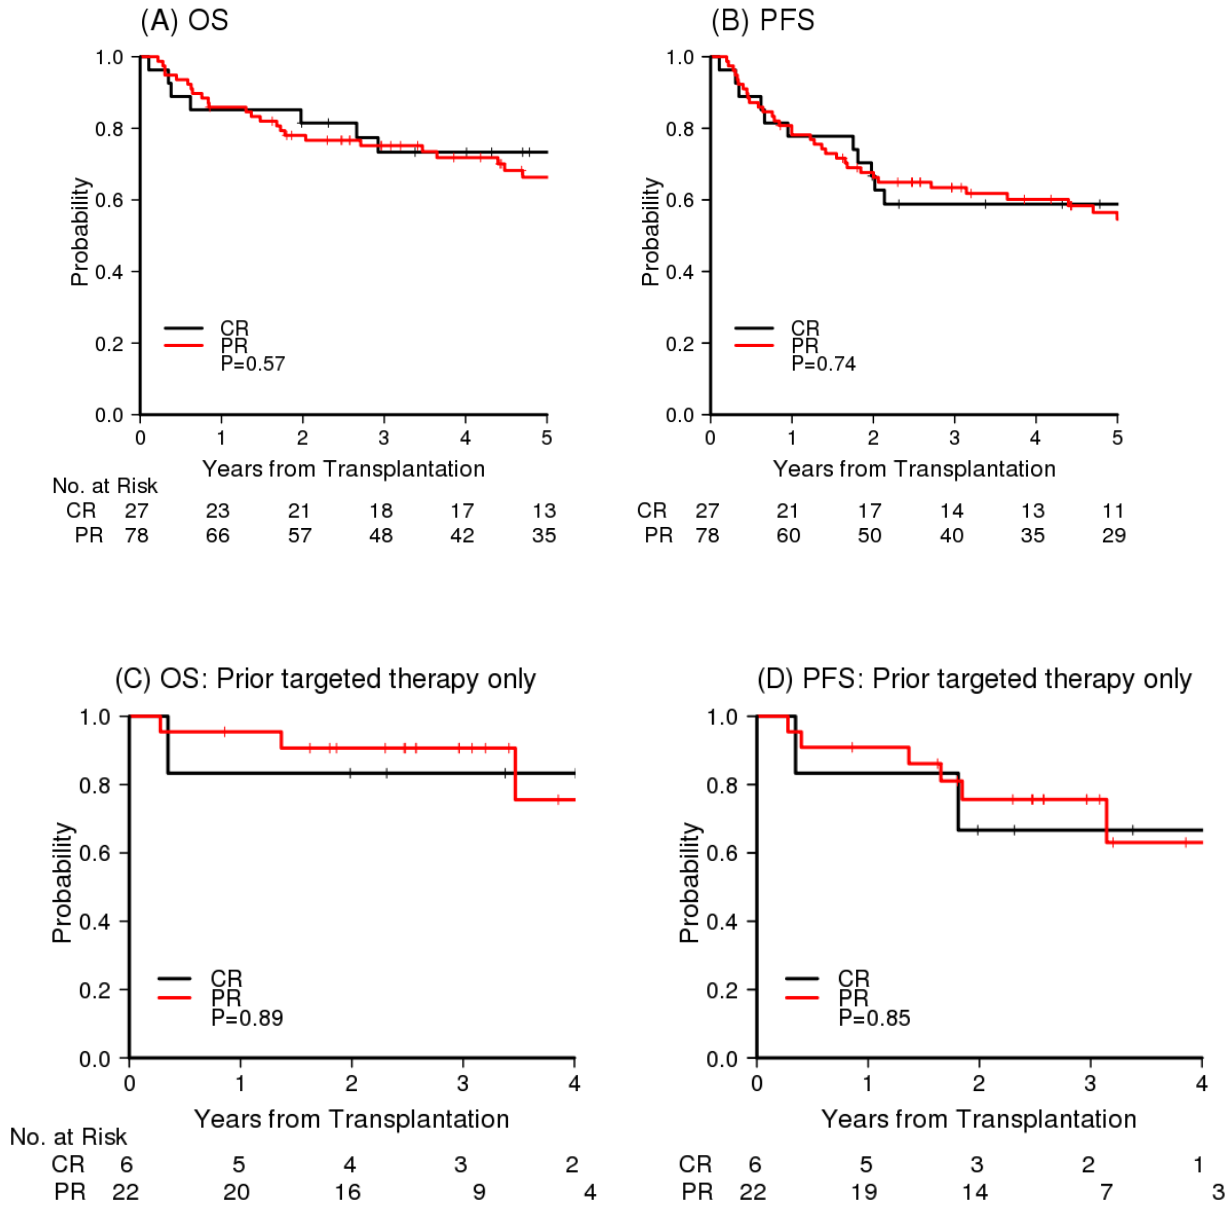

**Figure S4.** Immune reconstitution over time for patients who received Flu/BU2 only. \* denotes p-value <0.05 and \*\* denotes p-value <0.01 for the comparison between two cohorts.

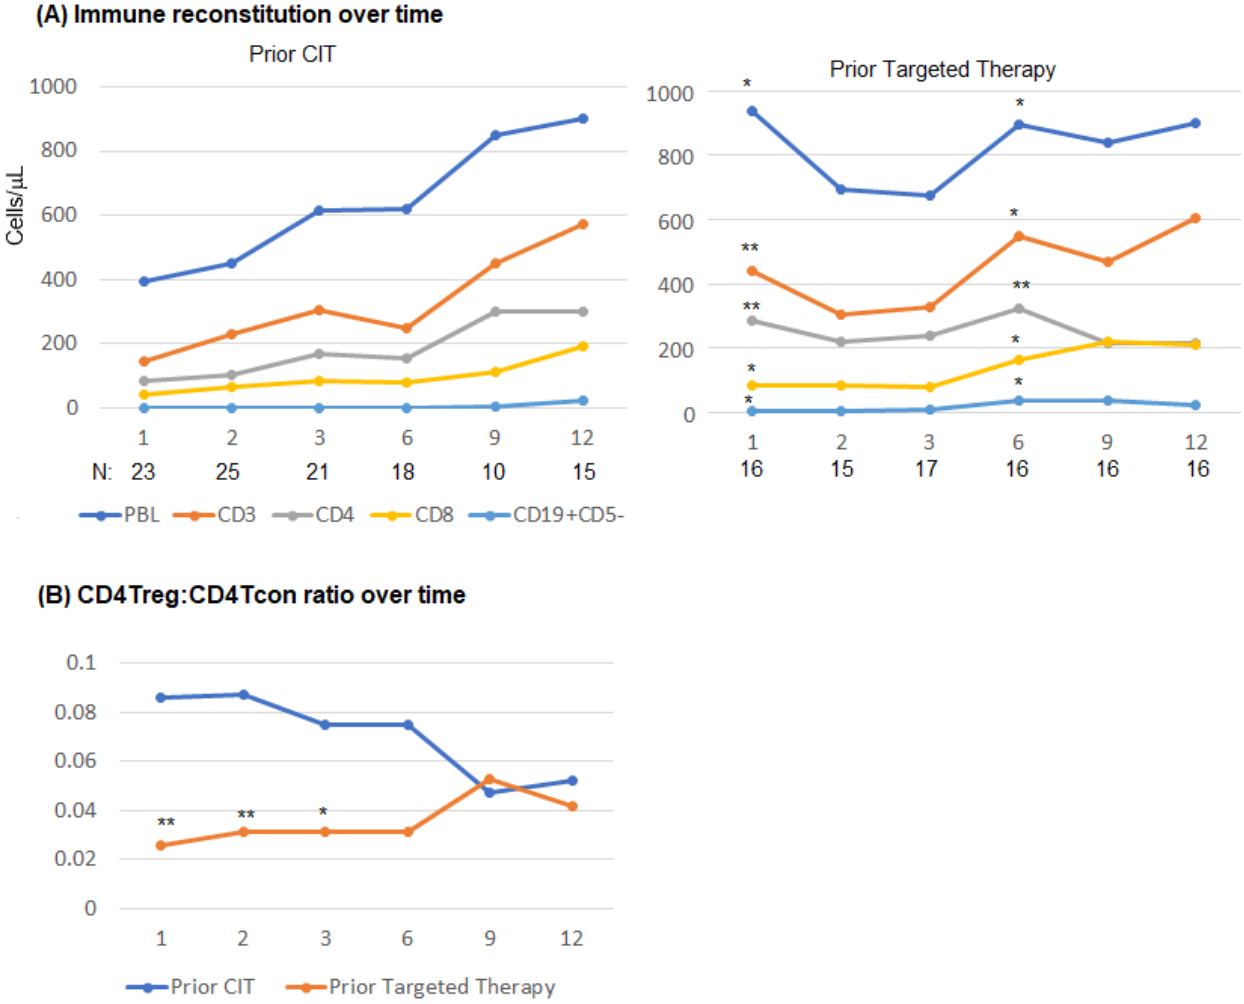

Supplement: advancesADV2020002184-suppl1.pdf [file advancesADV2020002184-suppl1.pdf]
